# Supplementary material
Source: Springer Nature journal article supplement (http://www.nature.com/nchembio/journal/v3/n7/extref/nchembio.2007.3-S5.pdf)
Supplement: nchembio.2007.3-S5.pdf [file nchembio.2007.3-S5.pdf]

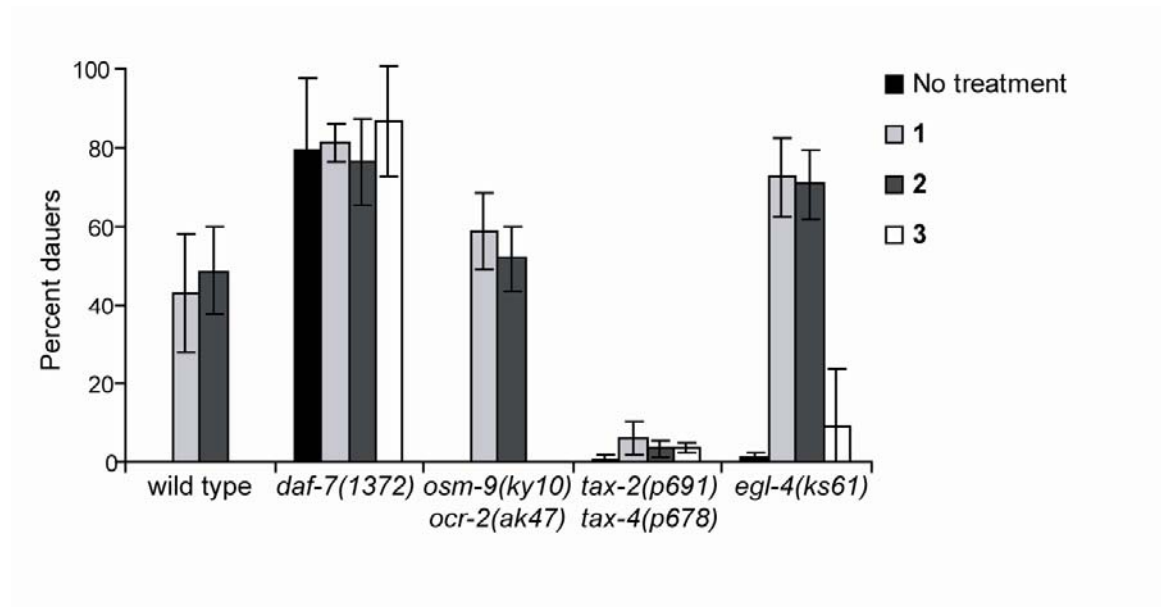

**Supplementary Figure 5** Comparison of the activities of **1**, **2**, and **3** at 6  $\mu$ M in the dauer formation assay in different mutant backgrounds at 20 °C. Data represent the average of at least two experiments, and error bars represent  $\pm$  one standard deviation. Assays were performed as described in Supplementary Methods except that strains were grown at 16°C instead of room temperature prior to assay and were not synchronized for the egg lay. These differences may explain why the wild-type (N2) worms show slightly less dauer formation than they did in the titration experiments (see **Figure 2b**). For strains that do not lay eggs as quickly as wild-type worms, 10 adult worms instead of 5 were used in the egg lay.
